# Supplementary material
Source: Springer Nature journal article supplement (https://www.springermedizin.de/resource/supplementary/12879_2011_1741_MOESM1_ESM.pdf/9443728)
Supplement: MOESM1 [file 9443728]

\* Readers should receive appropriate training in advance  
 \* Uncertain abnormalities should not be recorded  
 \* Cross should be made, unless otherwise stated

0.1 Subject number

0.2 Date of X-ray      
 DD MM YYYY

0.3 Radiograph quality     1 = high quality, 2 = acceptable, 3 = barely readable, 4 = unreadable. Comment: .....

1.0 Radiograph completely normal  Y  N check when full assessment has been completed

2.0 Any abnormalities consistent with TB  Y  N check when A to E assessment has been completed

A.1 Cavitation  0  R  L

0 = no lesions; R or L = right or left lung zones affected by the lesions of interest; depending on the spread of lesions, more than one zone can be selected.  
 = upper zones  
 = middle zones  
 = lower zones

A.2 Infiltration  0  R  L

opacities not to represent cavitation, scar, or nodules

A.3 Nodules (any size)  0  R  L

nodular lesion of any size

A.4 Fibrotic scarring  0  R  L

volume loss/collapse/bronchiectasis is often associated

A.5 Pleural thickening  0  R  L

A.6 Calcification  0  R  L

calcification related to active or healed TB lesions

B.1 Pleural effusion  0  R  L

C.1 Previous X-ray  Y  N

C.2 Date      
 DD MM YYYY

C.3 Present X-ray  better  same  worse

D.1 Hilar lymphadenopathy  0  R  L

E.1 Any other abnormality consistent with tuberculosis  Y  N Specify: .....  
 .....

3.0 Any other abnormality  Y  N Specify: .....  
 .....

0.4 Reader

0.5 Reading date      
 DD MM YYYY
